# Supplementary material
Source: publisher figshare collection journal article supplement (https://tandf.figshare.com/ndownloader/files/19788455)

## SUPPLEMENTARY MATERIAL

### **Evaluating Graphical Manipulations in Automatically Laid Out LineSets: Supplementary Material**

Dominique Tranquille<sup>a</sup> and Gem Stapleton<sup>a</sup> and Jim Burton<sup>a</sup> and Peter Rodgers<sup>b</sup>

<sup>a</sup>Centre for Secure, Intelligent and Usable Systems, University of Brighton, UK; <sup>b</sup>University of Kent, UK

#### **ARTICLE HISTORY**

Compiled November 4, 2019

#### **1. Diagrams and Questions used to Introduce Participants to Concepts of LineSets**

This supplementary material includes all of the diagrams and questions asked of participants during the study, including the diagrams used to introduce participants to LineSets. We note that the diagrams are scaled to 35% of their size, due to space limitations.

---

CONTACT Gem Stapleton. Email: [g.e.stapleton@brighton.ac.uk](mailto:g.e.stapleton@brighton.ac.uk)

### *Introduction Diagram*

Diagrams used to introduce LineSets to participants.

- Default:

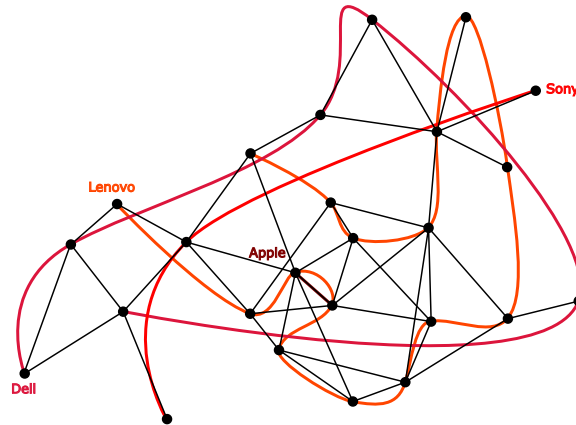

- Treated:

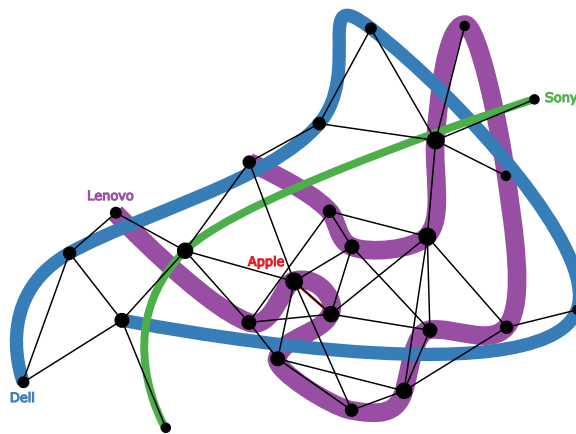

*Example question 1*

**Question:** Which product was bought the most times?

- Sony
- Google
- Casio
- BenQ

**Answer:** Google

- **Default Group Diagram:**

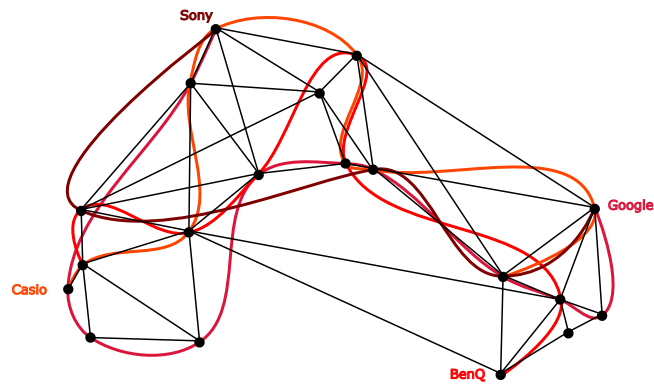

- **Treated Group Diagram:**

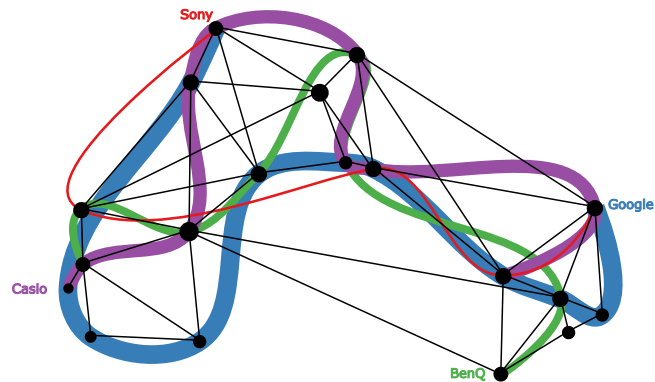

*Example question 2*

**Question:** Which product was bought the fewest times?

- Nokia
- BenQ
- Apple
- Dell

**Answer:** Dell

- **Default Group Diagram:**

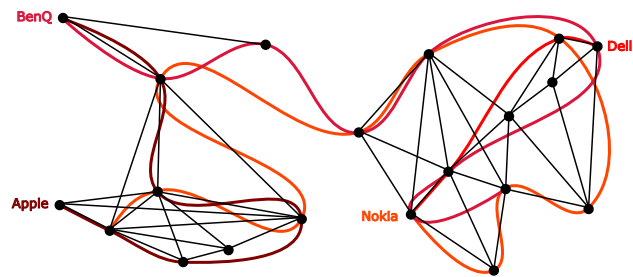

- **Treated Group Diagram:**

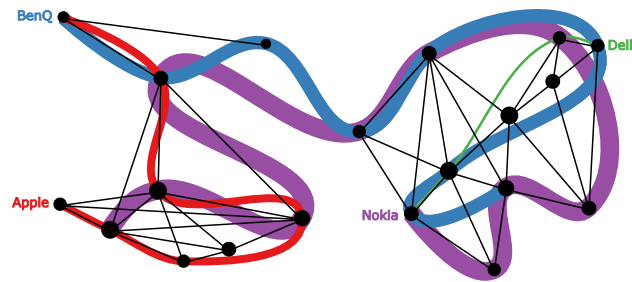

*Example question 3*

**Question:** How many friends do the people with the most friends have?

- 4
- 5
- 6
- 7

**Answer:** 7

- **Default Group Diagram:**

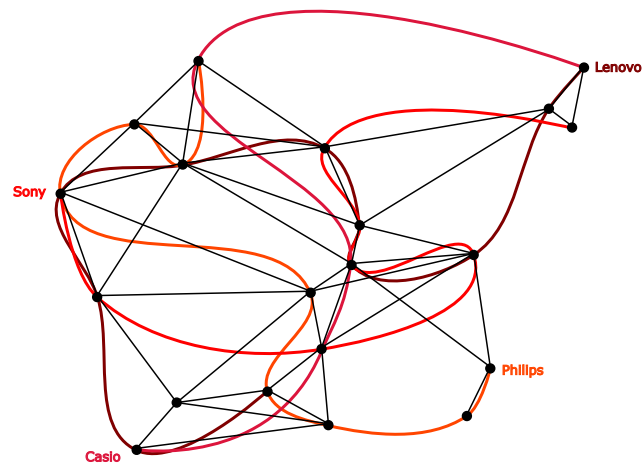

- **Treated Group Diagram:**

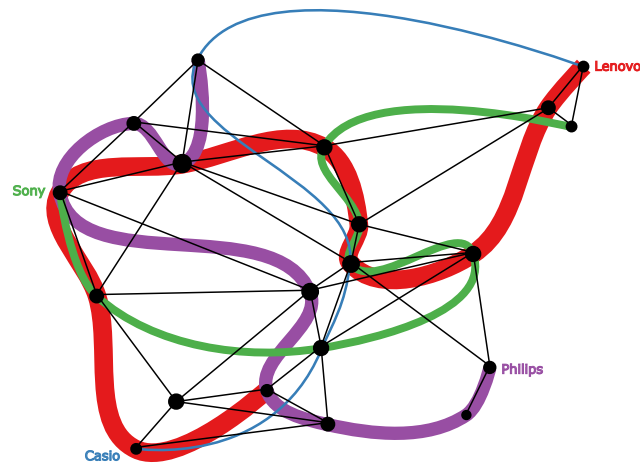

*Example question 4*

**Question:** How many friends do the people with the fewest friends have?

- 0
- 1
- 2
- 3

**Answer:** 2

- **Default Group Diagram:**

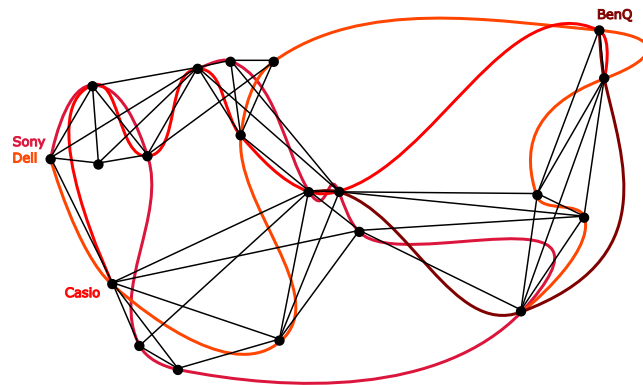

- **Treated Group Diagram:**

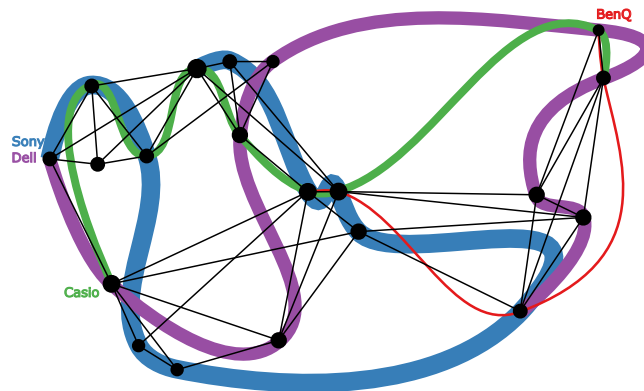

*Example question 5*

**Question:** How many people who bought Dell also bought Sony?

- 1
- 2
- 3
- 4

**Answer:** 3

- **Default Group Diagram:**

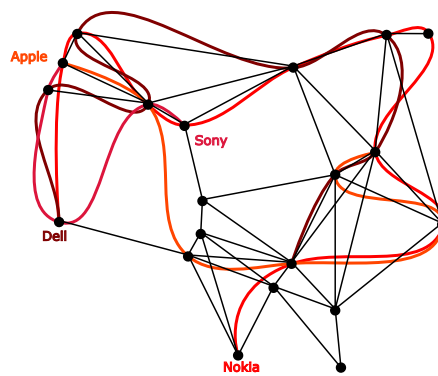

- **Treated Group Diagram:**

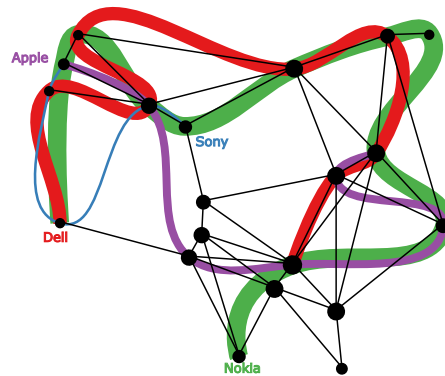

*Example question 6*

**Question:** How many other brands were bought by people who have Nokia?

- 0
- 1
- 2
- 3

**Answer:** 3

- **Default Group Diagram:**

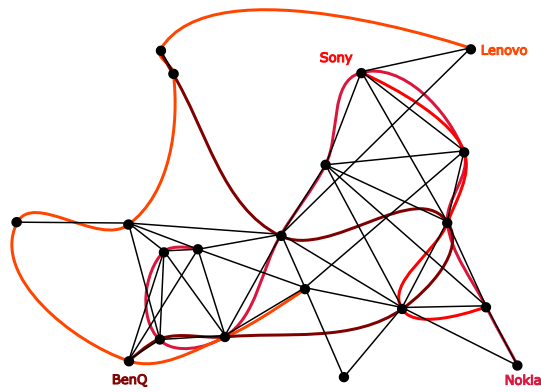

- **Treated Group Diagram:**

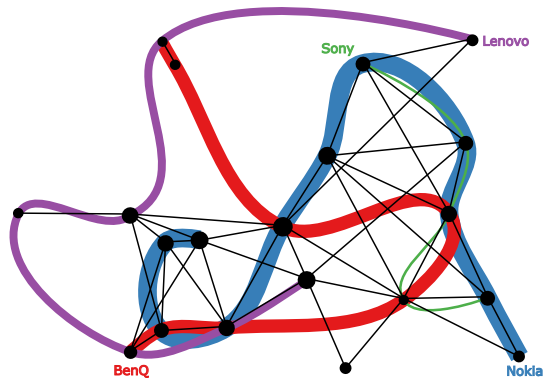



*Paper-based training question 1*

**Question:** Which product was bought the most times?

- Lenovo
- Sony
- BenQ
- Apple

**Answer:** BenQ

- **Default Group Diagram:**

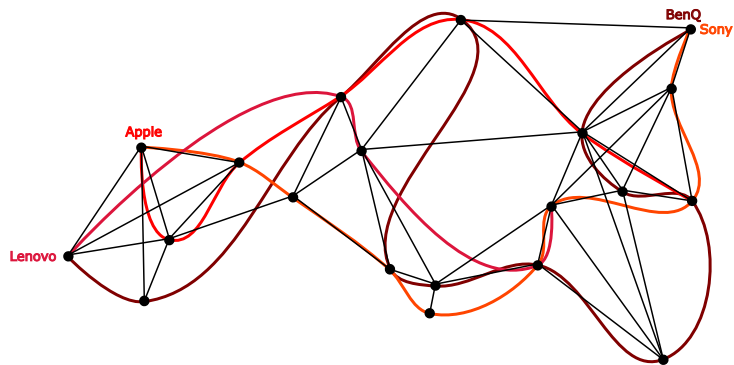

- **Treated Group Diagram:**

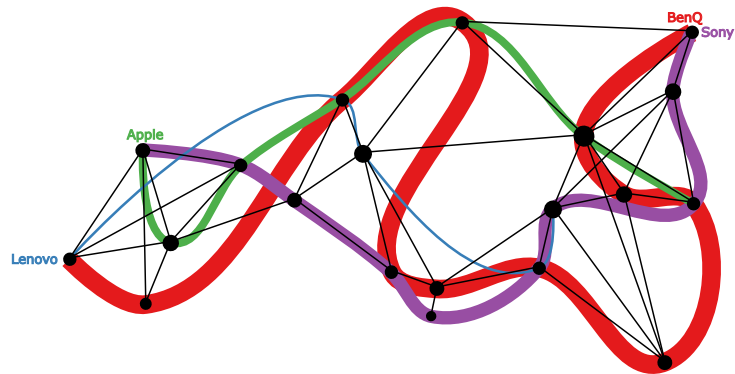

*Paper-based training question 2*

**Question:** Which product was bought the fewest times?

- Philips
- Sony
- Dell
- Nokia

**Answer:** Philips

- **Default Group Diagram:**

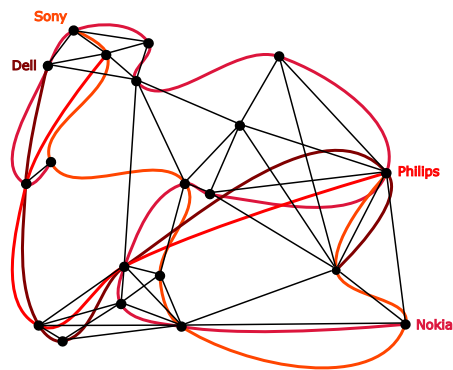

- **Treated Group Diagram:**

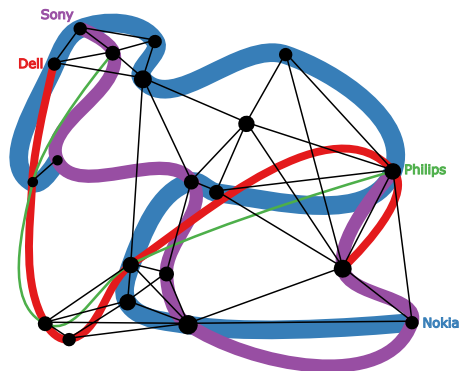

*Paper-based training question 3*

**Question:** How many friends do the people with the most friends have?

- 8
- 9
- 10
- 11

**Answer:** 9

- **Default Group Diagram:**

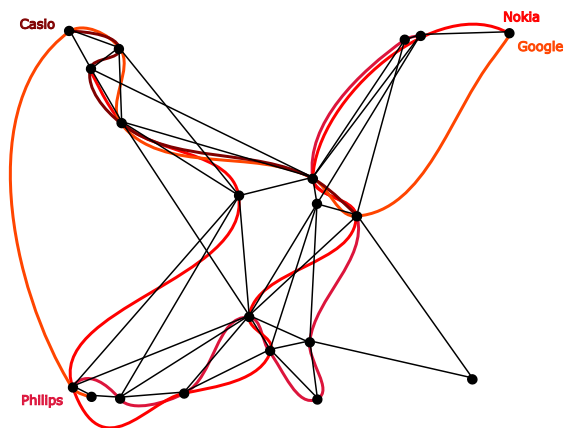

- **Treated Group Diagram:**

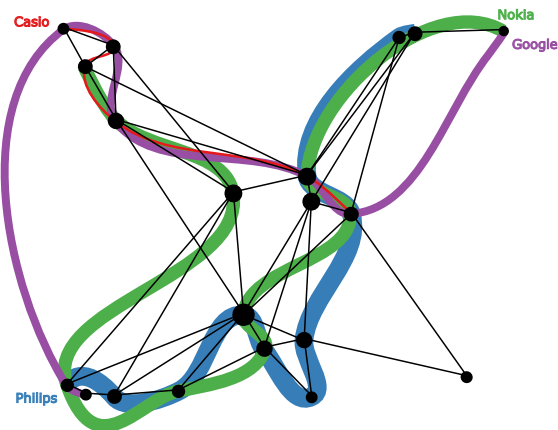

*Paper-based training question 4*

**Question:** How many friends do the people with the fewest friends have?

- 0
- 1
- 2
- 3

**Answer:** 1

- **Default Group Diagram:**

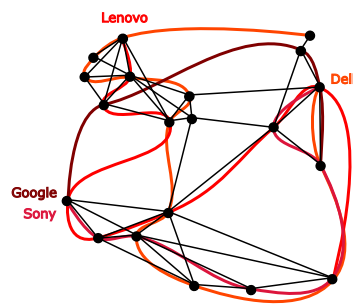

- **Treated Group Diagram:**

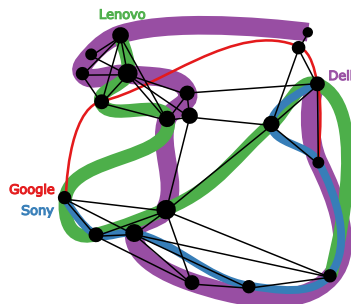

*Paper-based training question 5*

**Question:** How many people who bought BenQ also bought Dell?

- 4
- 5
- 6
- 7

**Answer:** 4

- **Default Group Diagram:**

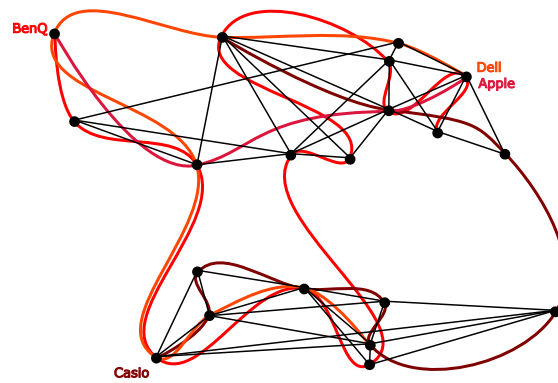

- **Treated Group Diagram:**

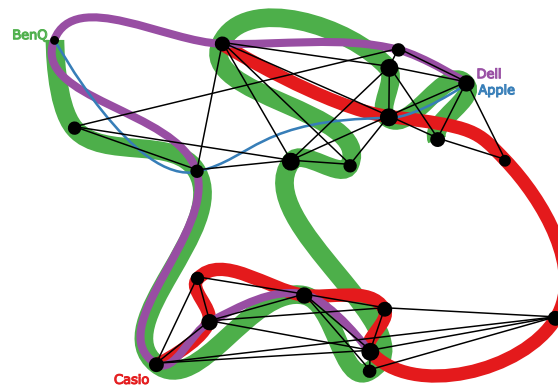

*Paper-based training question 6*

**Question:** How many other brands were bought by people who have Google?

- 1
- 2
- 3
- 4

**Answer:** 2

- **Default Group Diagram:**

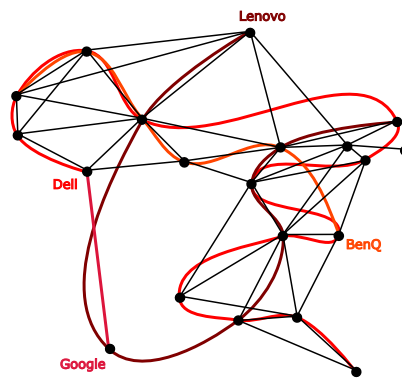

- **Treated Group Diagram:**

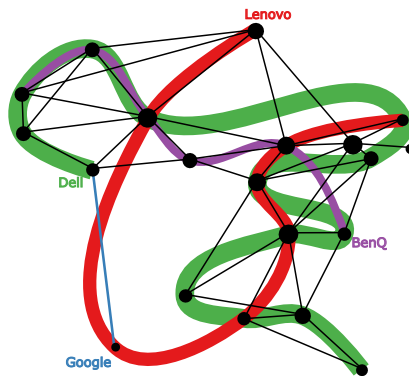

## 2. Diagrams and Questions used to Introduce Participants to Research Software in Automated Layouts Experiment

### *Computer-based training question 1*

**Question:** Which product was bought the MOST times?

- BenQ
- Apple
- Casio
- Philips

**Answer:** Philips

- **Default Group Diagram:**

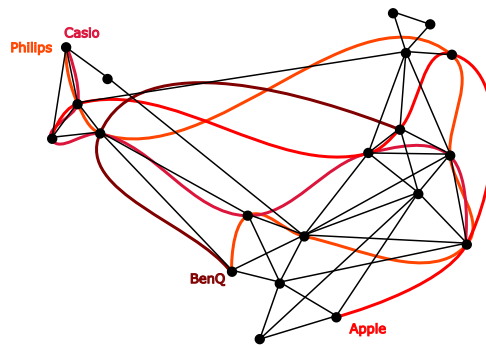

- **Treated Group Diagram:**

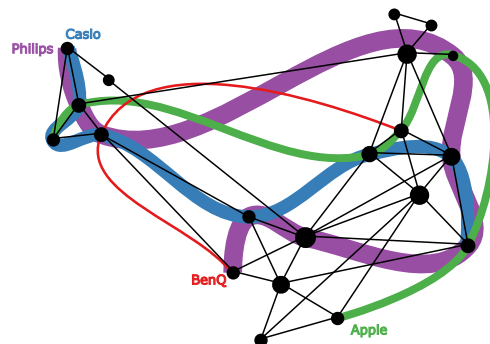

### *Computer-based training question 2*

**Question:** Which product was bought the FEWEST times?

- Apple
- Philips
- Dell
- Sony

**Answer:** Apple

- **Default Group Diagram:**

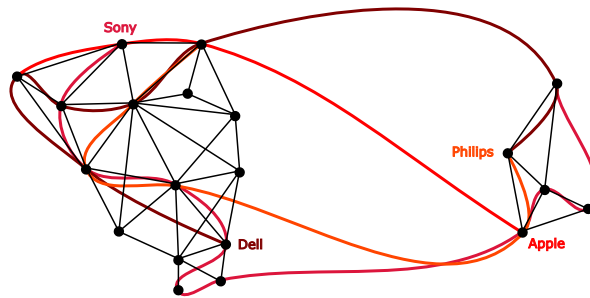

- **Treated Group Diagram:**

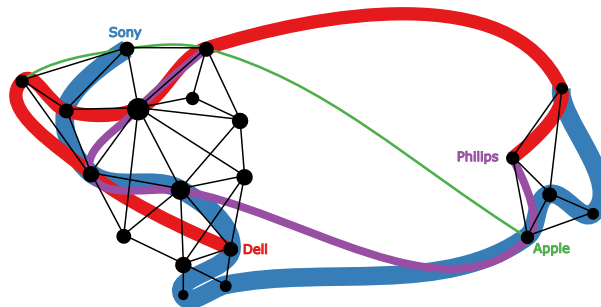



*Computer-based training question 3*

**Question:** How many friends do the people with the MOST friends have?

- 6
- 7
- 8
- 9

**Answer:** 9

- **Default Group Diagram:**

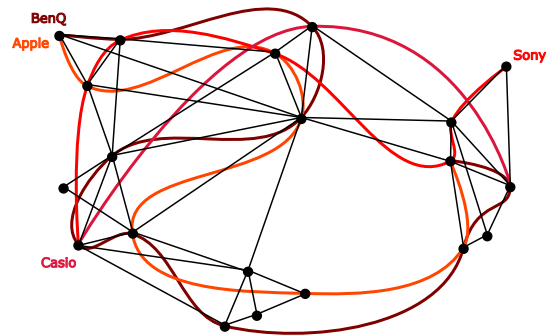

- **Treated Group Diagram:**

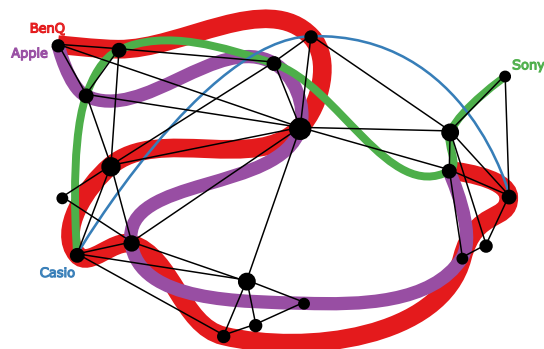

*Computer-based training question 4*

**Question:** How many friends do the people with the FEWEST friends have?

- 0
- 1
- 2
- 3

**Answer:** 2

- **Default Group Diagram:**

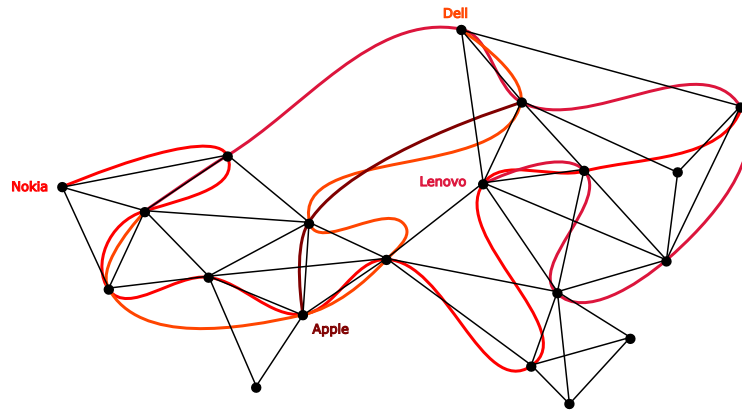

- **Treated Group Diagram:**

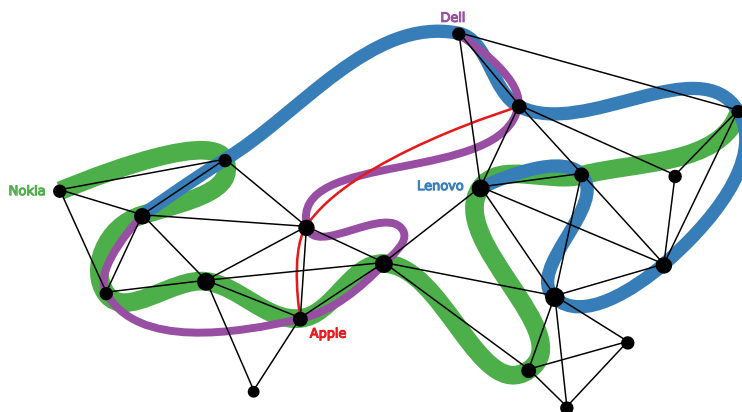

*Computer-based training question 5*

**Question:** How many people who bought CASIO also bought SONY?

- 1
- 2
- 3
- 4

**Answer:** 3

- **Default Group Diagram:**

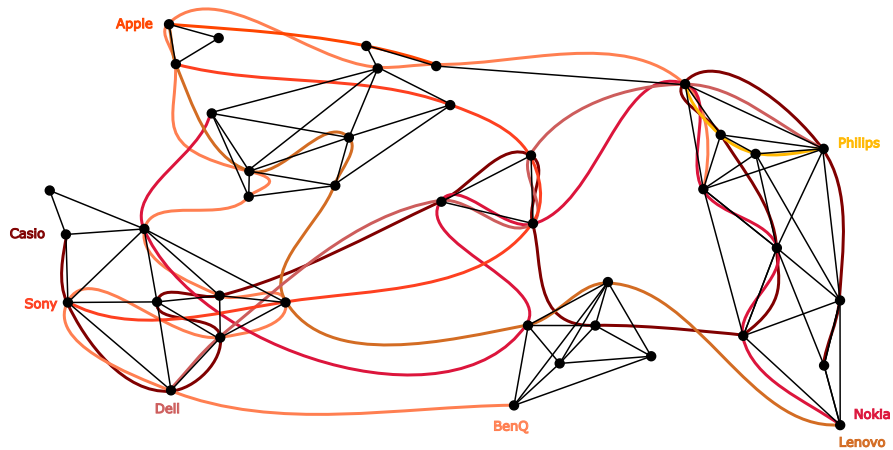

- **Treated Group Diagram:**

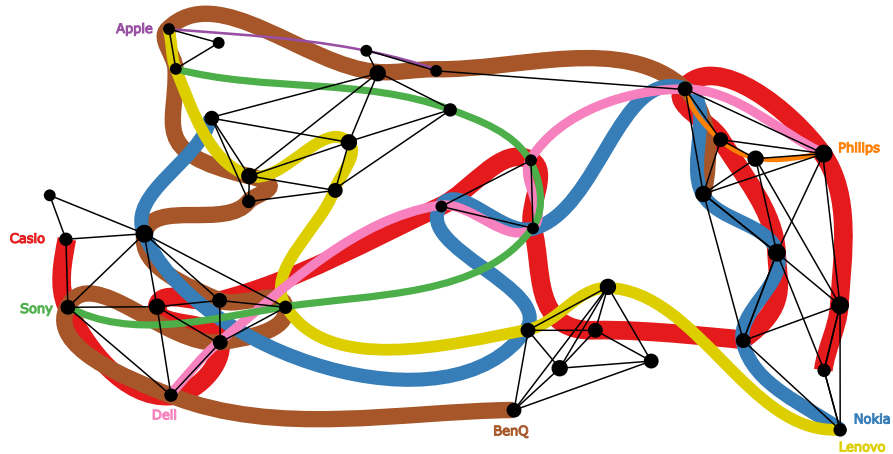

*Computer-based training question 6*

**Question:** How many other brands were bought by people who have NOKIA?

- 2
- 3
- 4
- 5

**Answer:** 5

- **Default Group Diagram:**

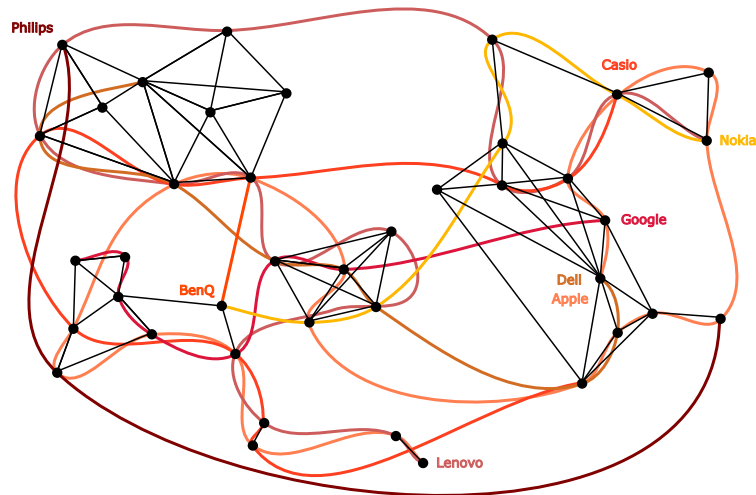

- **Treated Group Diagram:**

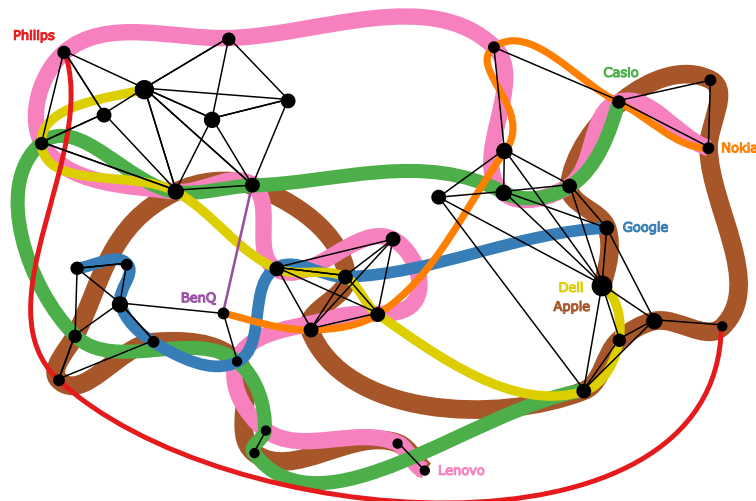

### 3. Diagrams and Questions used to Collect Performance Data in Automated Layouts Experiment

#### *Performance question 1*

SNAP dataset: 39070445

**Question:** How many people who bought LENOVO also bought DELL?

- 0
- 1
- 2
- 3

Answer: 0

- Default Group Diagram:

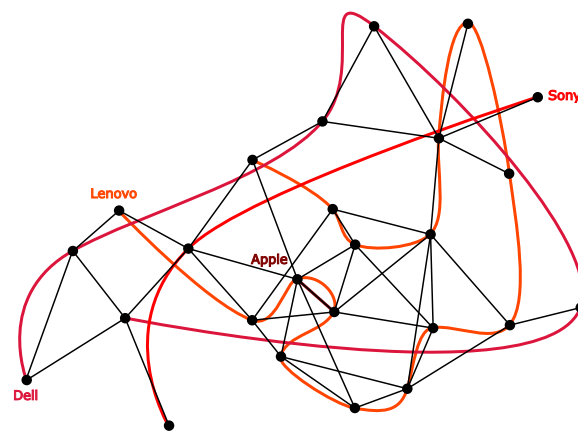

- Treated Group Diagram:

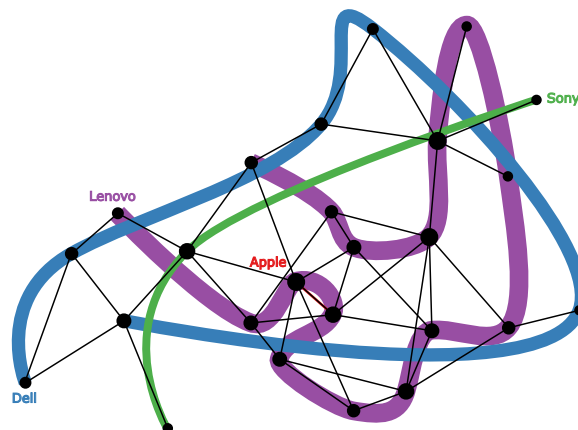

*Performance question 2*

**SNAP dataset:** 289738351

**Question:** Which product was bought the MOST times?

- Sony
- Apple
- Google
- Lenovo

**Answer:** Google

- **Default Group Diagram:**

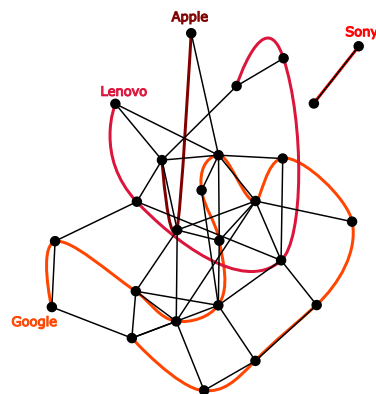

- **Treated Group Diagram:**

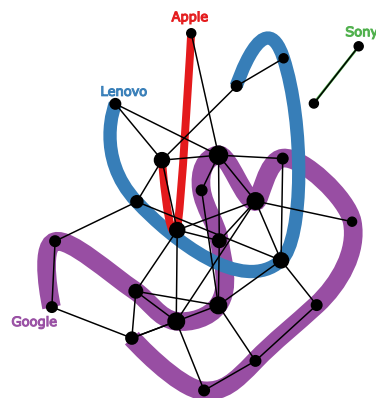

*Performance question 3*

**SNAP dataset:** 18687625

**Question:** How many other brands were bought by people who have PHILIPS?

- 0
- 1
- 2
- 3

**Answer:** 2

- **Default Group Diagram:**

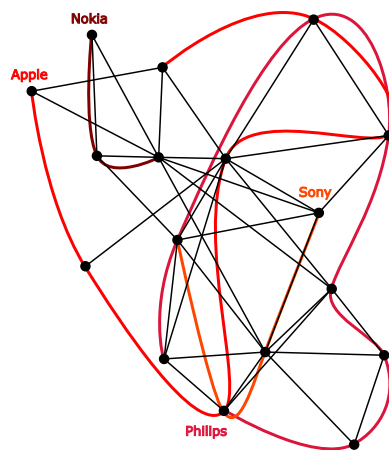

- **Treated Group Diagram:**

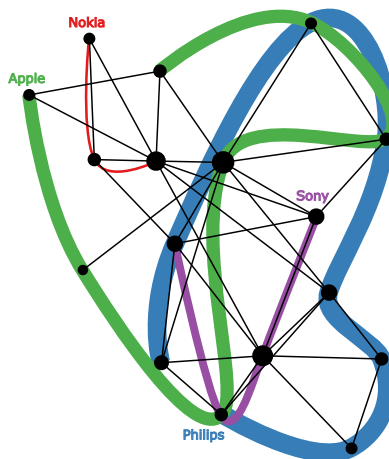

*Performance question 4*

**SNAP dataset:** 70492333

**Question:** How many other brands were bought by people who have NOKIA?

- 1
- 2
- 3
- 4

**Answer:** 2

- **Default Group Diagram:**

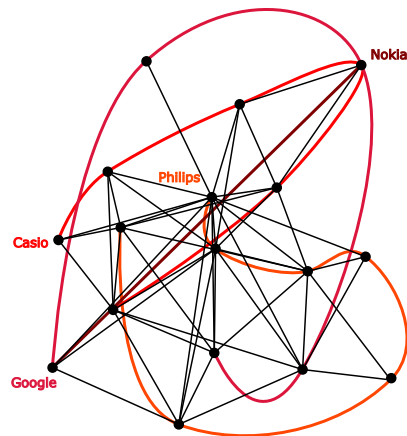

- **Treated Group Diagram:**

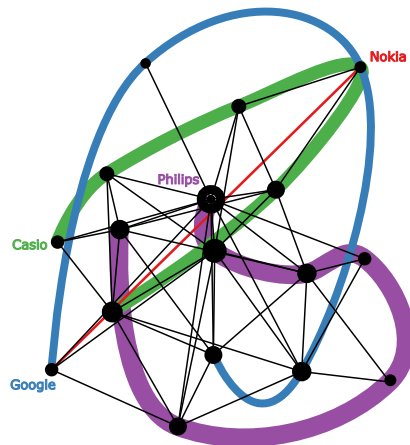



*Performance question 5*

**SNAP dataset:** 19725644

**Question:** Which product was bought the MOST times?

- Sony
- Philips
- Nokia
- Casio

**Answer:** Sony

- **Default Group Diagram:**

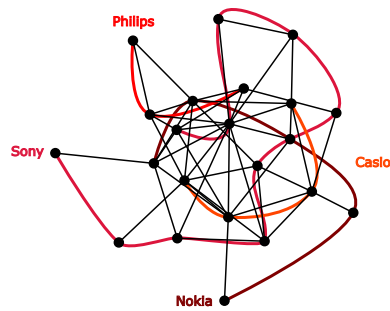

- **Treated Group Diagram:**

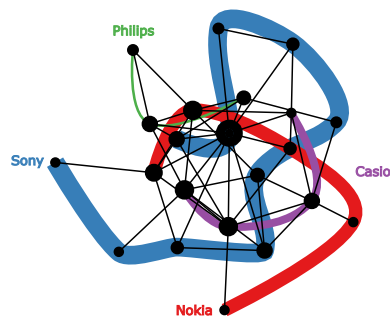

*Performance question 6*

**SNAP dataset:** 353767514

**Question:** Which product was bought the FEWEST times?

- Google
- Lenovo
- Dell
- Apple

**Answer:** Google

- **Default Group Diagram: SNAP dataset:**

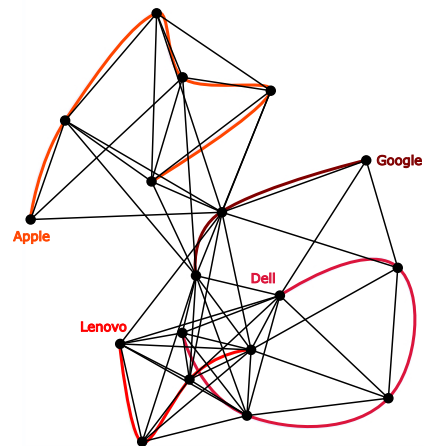

- **Treated Group Diagram:**

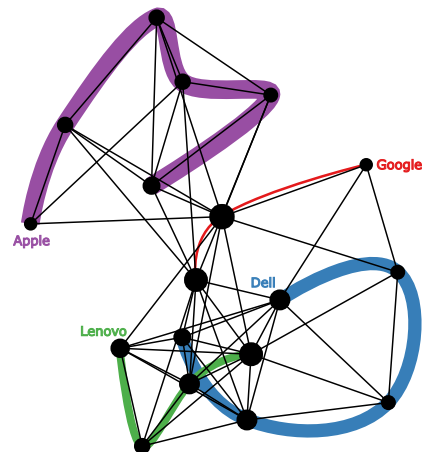

*Performance question 7*

**Task Type:** Extreme Set Size Min

**Question:** Which product was bought the FEWEST times?

- Casio
- Sony
- Apple
- Nokia

**Answer:** Apple

- **Default Group Diagram:**

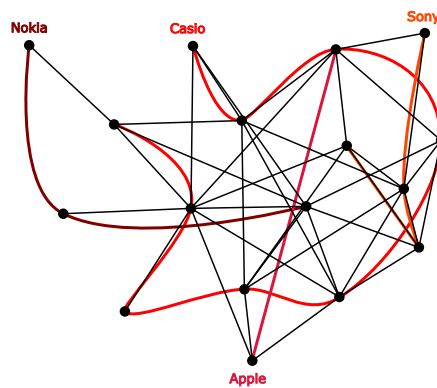

- **Treated Group Diagram:**

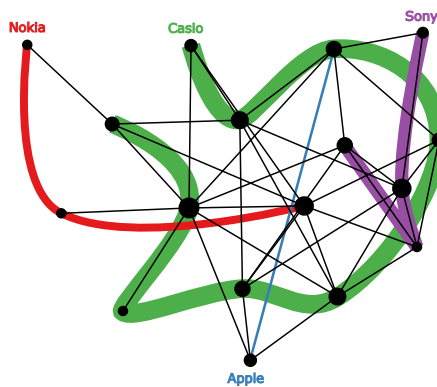

*Performance question 8*

**Task Type:** Extreme Node Degree Few

**Question:** How many friends do the people with the FEWEST friends have?

- 0
- 1
- 2
- 3

**Answer:** 1

- **Default Group Diagram:**

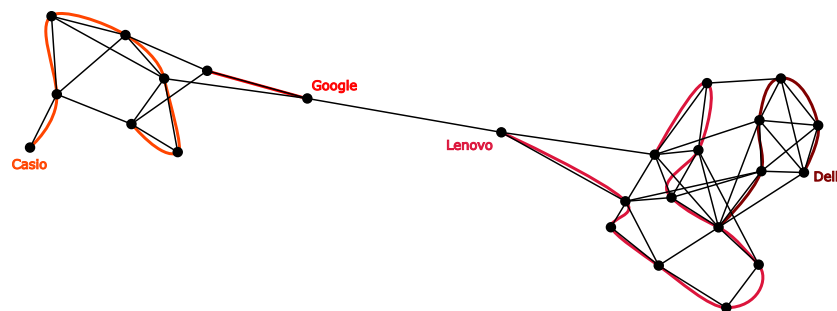

- **Treated Group Diagram:**

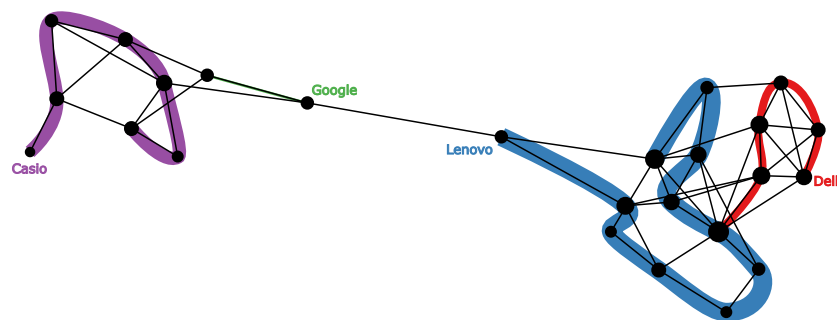

*Performance question 9*

**SNAP dataset:** 31246395

**Question:** How many friends do the people with the MOST friends have?

- 8
- 9
- 10
- 11

**Answer:** 10

- **Default Group Diagram:**

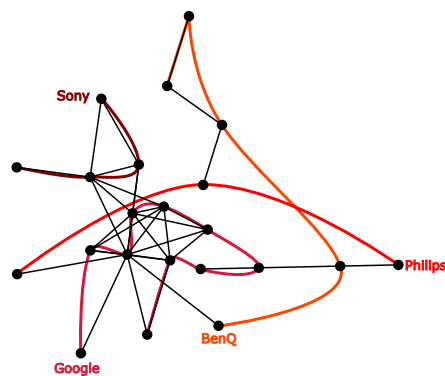

- **Treated Group Diagram:**

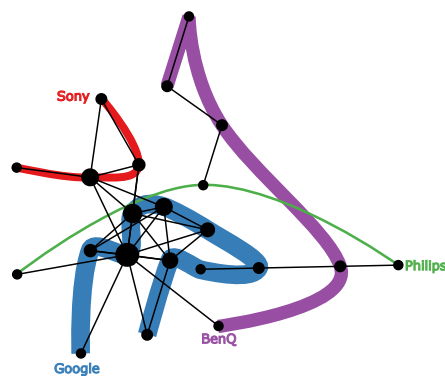

*Performance question 10*

**SNAP dataset:** 18951737

**Question:** How many friends do the people with the FEWEST friends have?

- 1
- 2
- 3
- 4

**Answer:** 2

- **Default Group Diagram:**

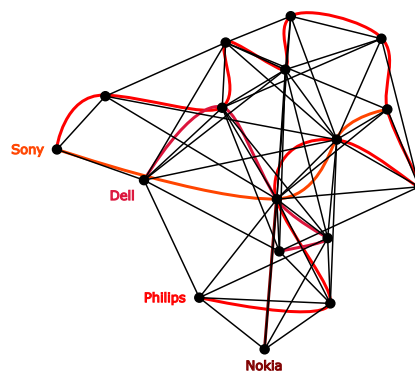

- **Treated Group Diagram:**

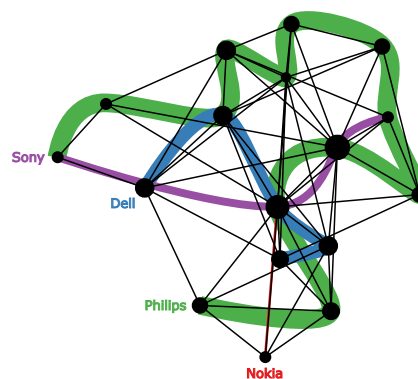

*Performance question 11*

**SNAP dataset:** 77843323

**Question:** How many people who bought SONY also bought DELL?

- 0
- 1
- 2
- 3

**Answer:** 1

- **Default Group Diagram:**

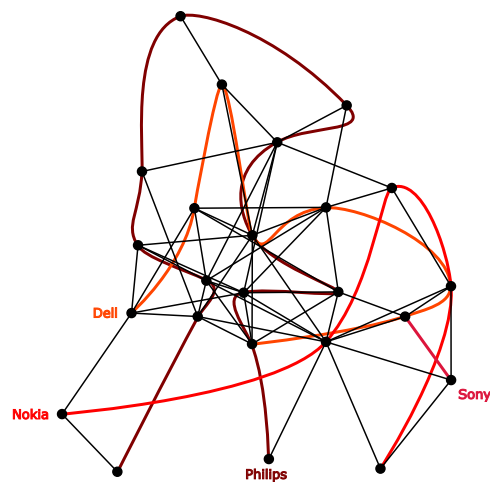

- **Treated Group Diagram:**

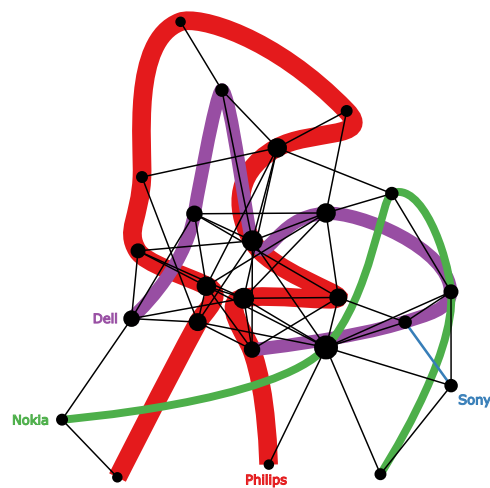

*Performance question 12*

SNAP dataset: 3245291

**Question:** How many friends do the people with the MOST friends have?

- 6
- 7
- 8
- 9

**Answer:** 8

- **Default Group Diagram:**

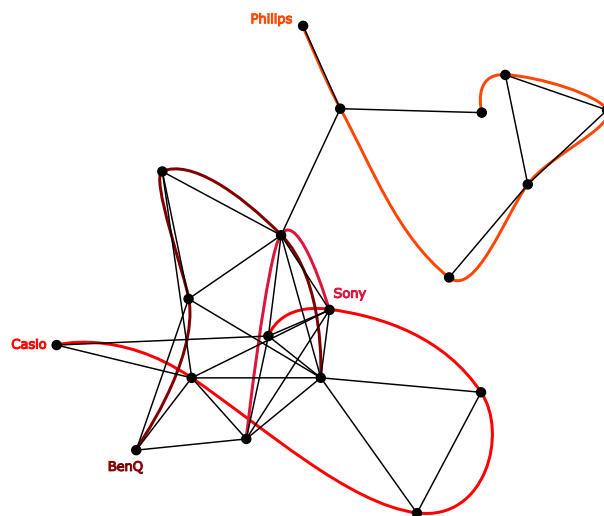

- **Treated Group Diagram:**

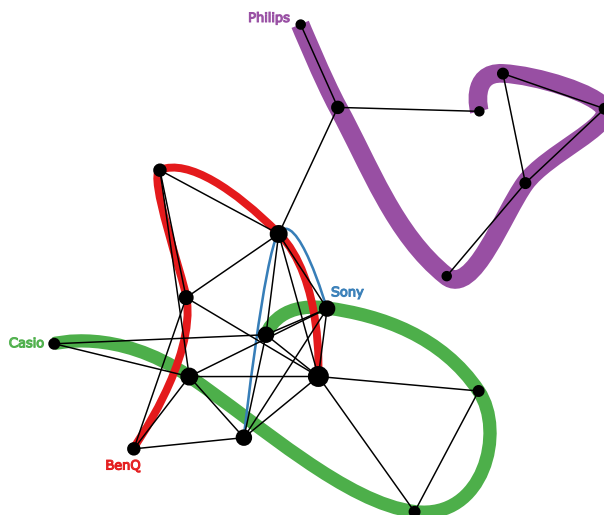



*Performance question 13*

**SNAP dataset:**

**Question:** Which product was bought the FEWEST times?

- Nokia
- Google
- Sony
- Casio

**Answer:** Sony

- **Default Group Diagram:**

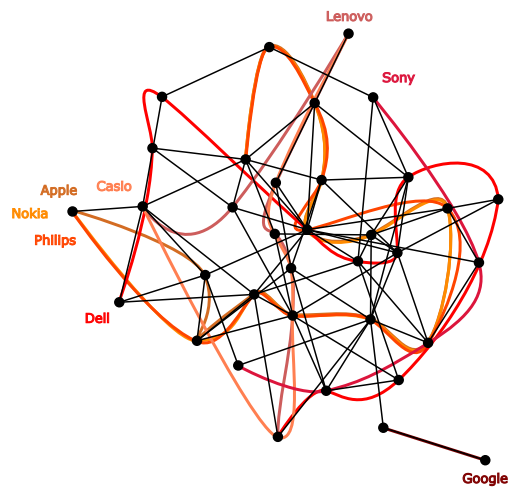

- **Treated Group Diagram:**

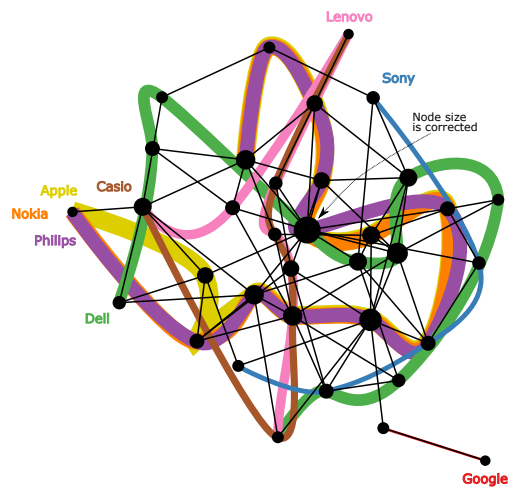

*Performance question 14*

SNAP dataset: 37977732

**Question:** Which product was bought the MOST times?

- Philips
- Nokia
- Sony
- Casio

**Answer:** Casio

- **Default Group Diagram:**

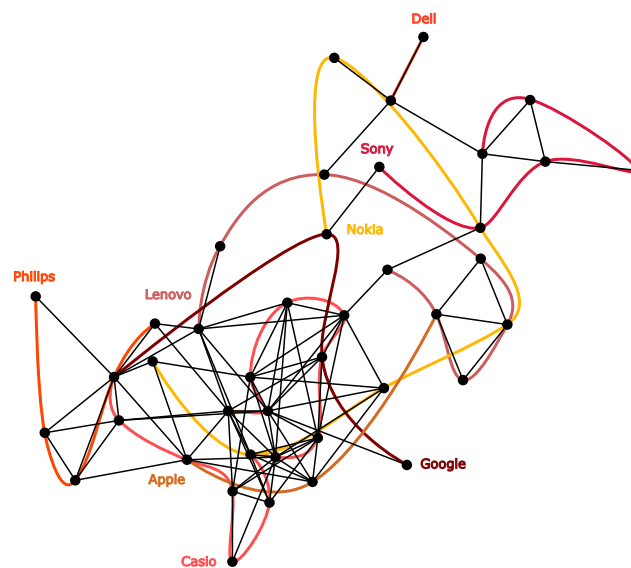

- **Treated Group Diagram:**

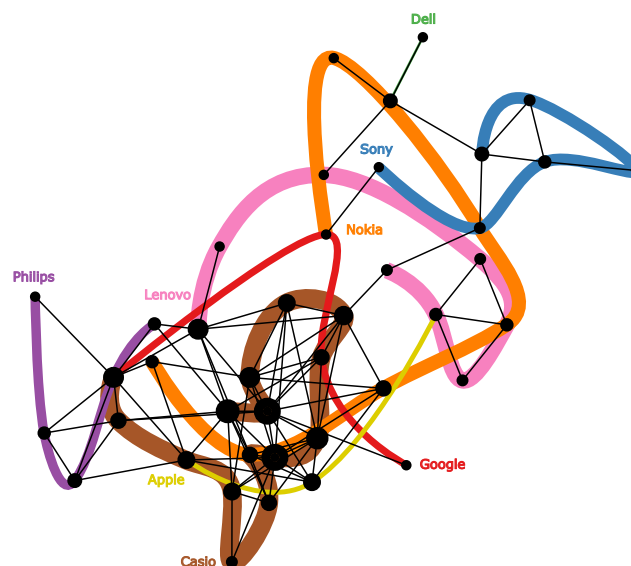

*Performance question 15*

SNAP dataset: 307458983

**Question:** How many friends do the people with the FEWEST friends have?

- 1
- 2
- 3
- 4

**Answer:** 1

- **Default Group Diagram:**

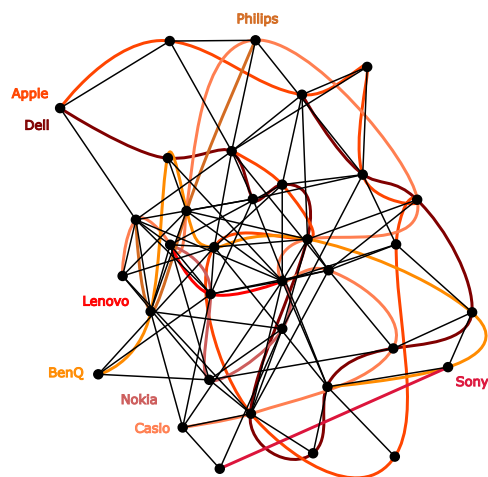

- **Treated Group Diagram:**

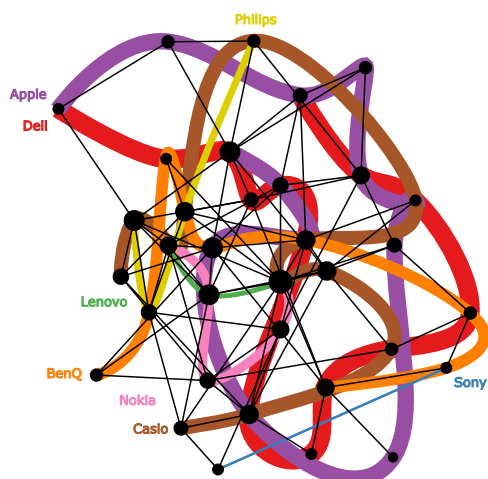

*Performance question 16*

SNAP dataset: 187744415

**Question:** Which product was bought the MOST times?

- Google
- Sony
- BenQ
- Casio

**Answer:** Casio

- **Default Group Diagram:**

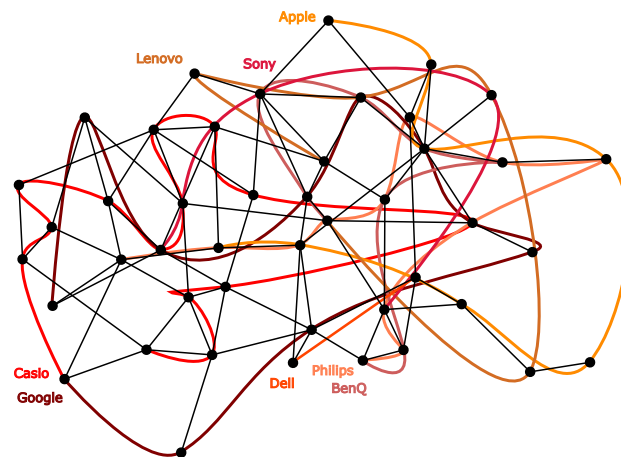

- **Treated Group Diagram:**

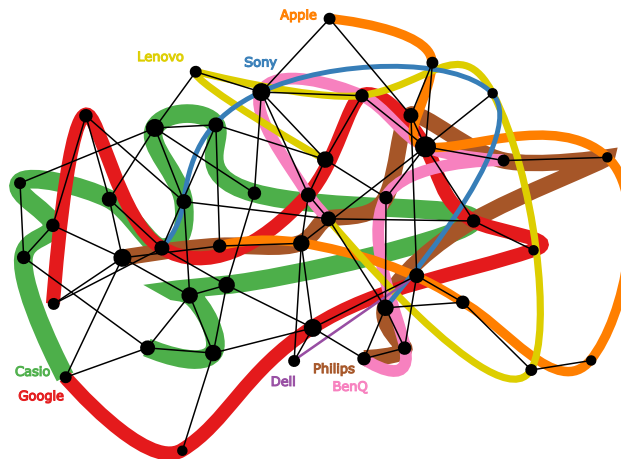

*Performance question 17*

**Task Type:** Control Sets

**Question:** How many other brands were bought by people who have GOOGLE?

- 5
- 6
- 7
- 8

**Answer:** 5

- **Default Group Diagram:**

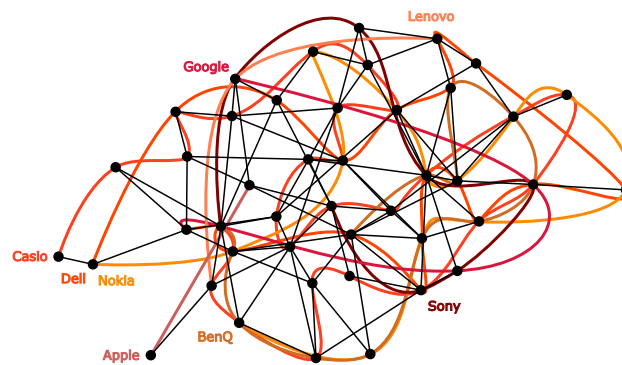

- **Treated Group Diagram:**

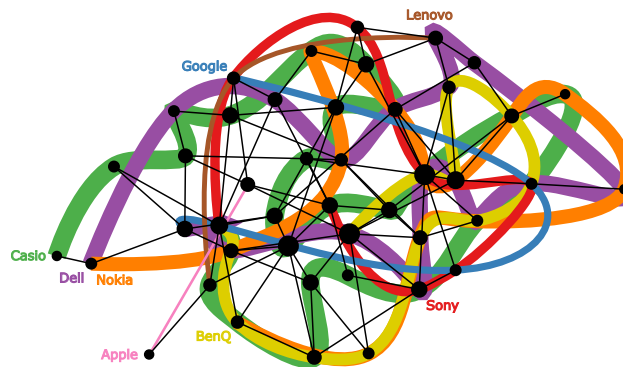

*Performance question 18*

SNAP dataset: 31610343

**Question:** How many friends do the people with the MOST friends have?

- 10
- 11
- 12
- 13

**Answer:** 12

- **Default Group Diagram:**

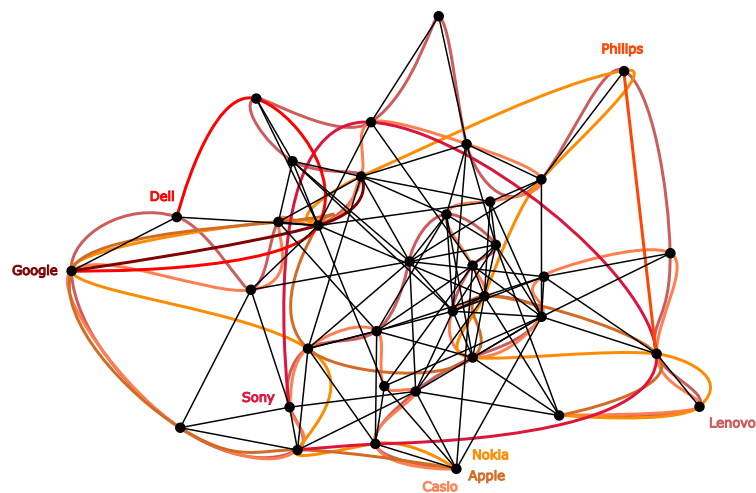

- **Treated Group Diagram:**

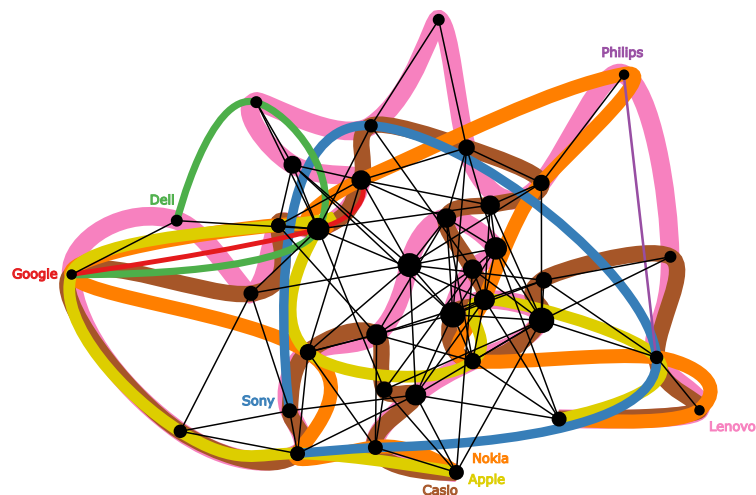

*Performance question 19*

**SNAP dataset:** 307458983

**Question:** How many friends do the people with the MOST friends have?

- 9
- 10
- 11
- 12

**Answer:** 12

- **Default Group Diagram:**

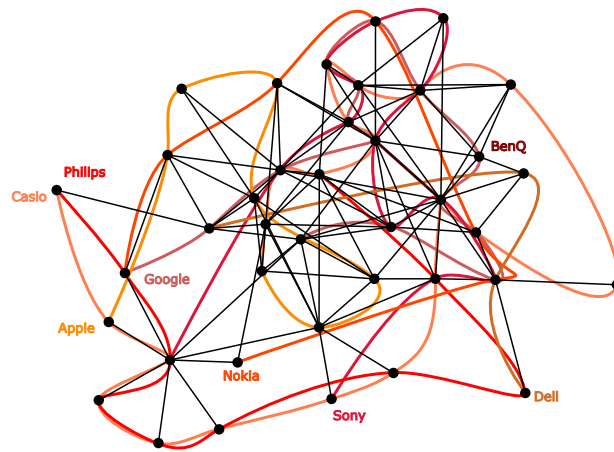

- **Treated Group Diagram:**

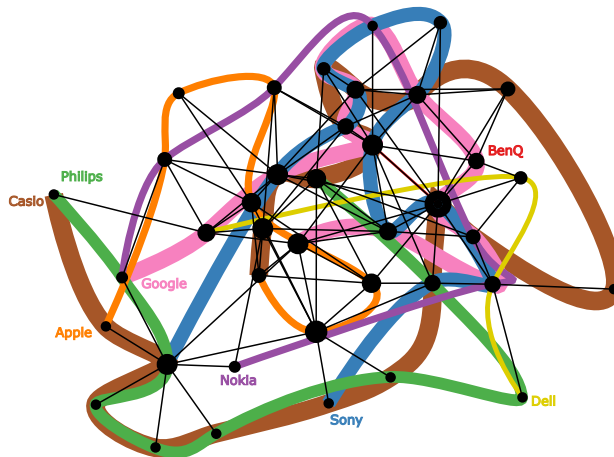

*Performance question 20*

SNAP dataset: 114885421

**Question:** How many people who bought BenQ also bought DELL?

- 0
- 1
- 2
- 3

**Answer:** 2

- **Default Group Diagram:**

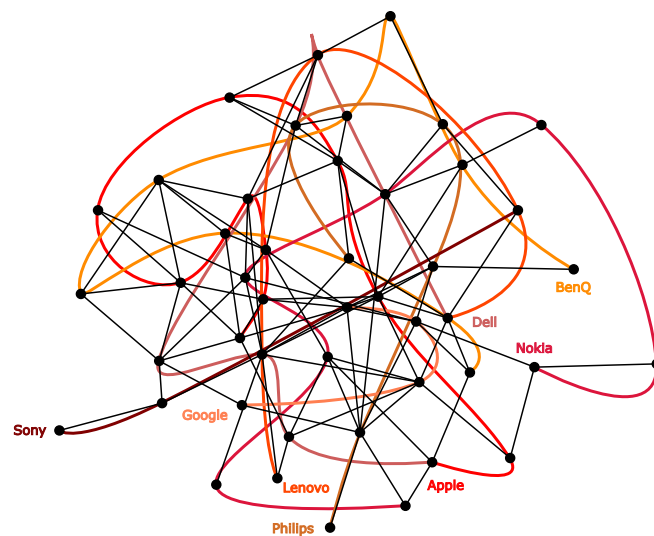

- **Treated Group Diagram:**

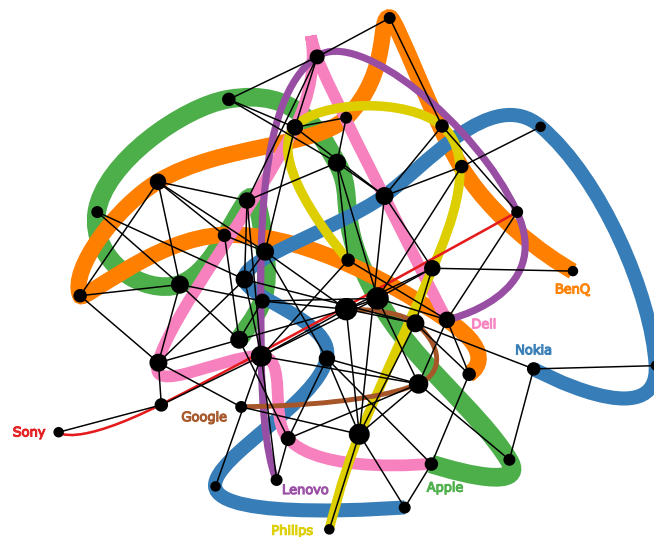



*Performance question 21*

SNAP dataset: 216843160

**Question:** How many friends does the person with the FEWEST friends have?

- 0
- 1
- 2
- 3

**Answer:** 1

- **Default Group Diagram:**



- **Treated Group Diagram:**

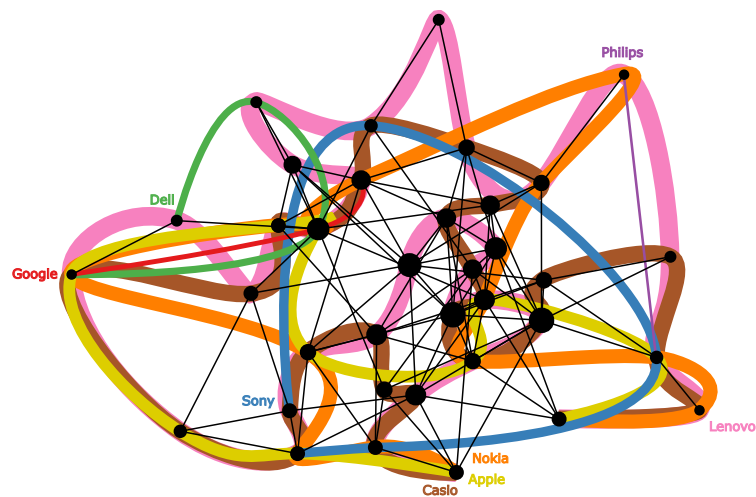

*Performance question 22*

**SNAP dataset:** 11348282

**Question:** How many other brands were bought by people who have CASIO?

- 1
- 2
- 3
- 4

**Answer:** 3

- **Default Group Diagram:**

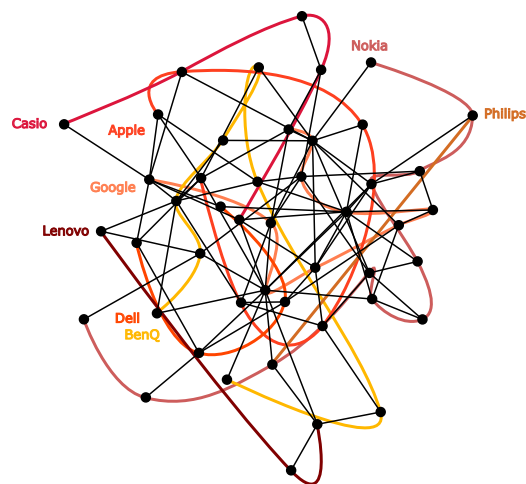

- **Treated Group Diagram:**

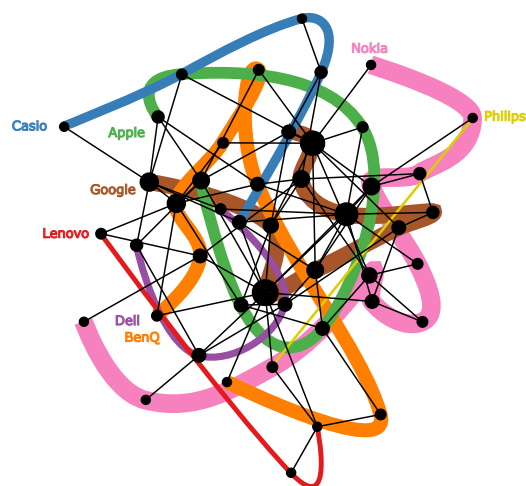

*Performance question 23*

**SNAP dataset:** 174285878

**Question:** Which product was bought the FEWEST times?

- Sony
- Google
- Dell
- Casio

**Answer:** 1

- **Default Group Diagram:**

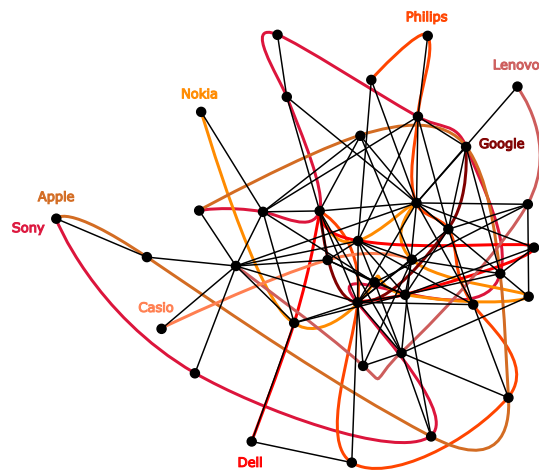

- **Treated Group Diagram:**

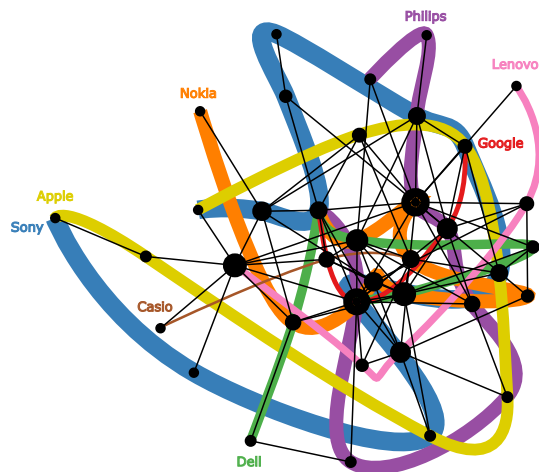

*Performance question 24*

**SNAP dataset:** 18270489

**Question:** How many people who bought NOKIA also bought APPLE?

- 3
- 4
- 5
- 6

**Answer:** 0

- **Default Group Diagram:**

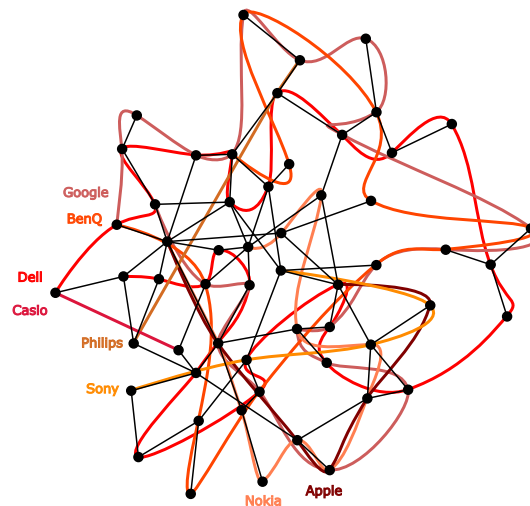

- **Treated Group Diagram:**

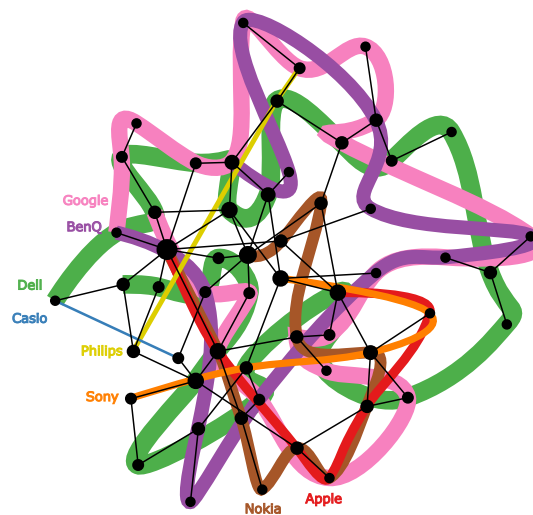

**4. Diagrams and Questions used to Collect Preference Data in Automated Layouts Experiment**

**Questions:**

(1) Indicate your preferred diagram with respect to your aesthetic preference.

Indicate which diagram you prefer with respect to its suitability to answering the following question:

- (2) Which product was bought the MOST times?
- (3) Which product was bought the FEWEST times?
- (4) How many friends do the people with the MOST friends have?
- (5) How many friends do the people with the FEWEST friends have?
- (6) How many people who bought Nokia also bought Sony?
- (7) How many other brands were bought by people who have Apple?

• **Equal Thickness Preference Diagram:**

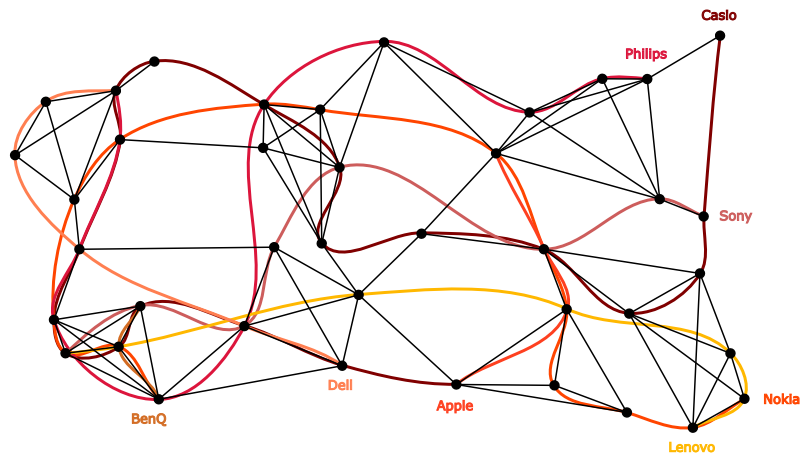

• **Varying Thickness Preference Diagram:**

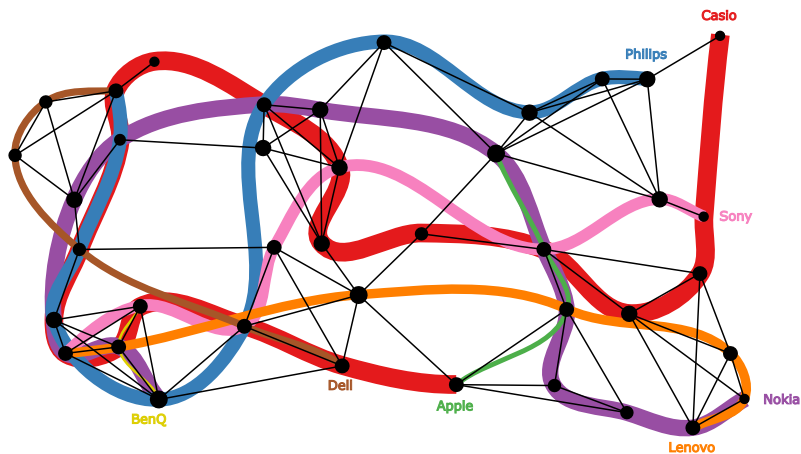

Supplement: Supplementary file 1 [file 19788455]
